# Supplementary material
Source: publisher figshare collection journal article supplement (https://springernature.figshare.com/ndownloader/files/18187046)
Supplement: Supplementary file [file 18187046]

## Additional File 1 for:

Mass campaigns combining antimalarial drugs and anti-infective vaccines as seasonal interventions for malaria control, elimination and prevention of resurgence: a modelling study

### Authors:

Flavia Camponovo<sup>1,2</sup>, Chris F. Ockenhouse<sup>3</sup>, Cynthia Lee<sup>3</sup>, Melissa A. Penny\*<sup>1,2</sup>

<sup>1</sup> Swiss Tropical and Public Health Institute, Basel, Switzerland

<sup>2</sup> University of Basel, Basel, Switzerland

<sup>3</sup> PATH's Malaria Vaccine Initiative, Washington, DC, USA

Corresponding author: [melissa.penny@unibas.ch](mailto:melissa.penny@unibas.ch)

### This PDF file includes:

Figs. S1 to S8

Tables S1 to S7

References for SI reference citations

**Table S1:** Overview of the input parameter values for the simulations and the direct outputs measured

| Parameter                                                                      | Values                                                                                                                                                                                                                                                                                                                              | Comments                                                                                                                                                                                                                                                                                                                 |
|--------------------------------------------------------------------------------|-------------------------------------------------------------------------------------------------------------------------------------------------------------------------------------------------------------------------------------------------------------------------------------------------------------------------------------|--------------------------------------------------------------------------------------------------------------------------------------------------------------------------------------------------------------------------------------------------------------------------------------------------------------------------|
| <b>Model Specificity</b>                                                       | Model R0068 (1)                                                                                                                                                                                                                                                                                                                     | Heterogeneity in transmission: within host variability. No immunity decay                                                                                                                                                                                                                                                |
| <b>EIR and <math>PfPR_{2-10}</math></b>                                        | EIR = 0.5, 1, 2, 3, or 5<br>Corresponding to $PfPR_{2-10}$ 1-20%                                                                                                                                                                                                                                                                    | $PfPR_{2-10}$ range of approximately 1-20%, see supplementary Figure S1                                                                                                                                                                                                                                                  |
| <b>Imported infections [per 1000 population]</b>                               | 0, 2, 20                                                                                                                                                                                                                                                                                                                            | Based on values used in previous simulations, reflecting a range of realistic importation of infections (2)                                                                                                                                                                                                              |
| <b>Level of case management as 5-day effective treatment probabilities [%]</b> | 5, 10, 20, 30, 40, 50%                                                                                                                                                                                                                                                                                                              | This equates to 14 day effective coverage ( $E_{14}$ ) of 15, 25, 45, 60, 70, 80%, chosen to reflect a range of current and realistic levels as well as improved levels of case management                                                                                                                               |
| <b>MDA drug parameterization</b>                                               | Dihydroartemisinin piperaquine (DHAP)<br>Initial blood stage clearance efficacy of 100%, with half-life of chemoprevention of 12 days                                                                                                                                                                                               | Parameterization as previously used in MDA modelling studies (3)                                                                                                                                                                                                                                                         |
| <b>Vaccine parameterization (referred to as RTS,S-like-duration vaccine)</b>   | initial efficacy = 91%<br>Biphasic decay implemented via a Weibull decay function ( $k=0.69$ ) and half-life = 0.61 years (7.3 months)                                                                                                                                                                                              | As per previously modelling of RTS,S with underlying vaccine properties parameters (4)<br>The fourth and fifth dose is assumed to have same parametrization                                                                                                                                                              |
| <b>Longer duration vaccine parameterization</b>                                | initial efficacy = 91%<br>implemented via a Weibull decay function ( $k=0.69$ ) and half-life = 1.5 years                                                                                                                                                                                                                           |                                                                                                                                                                                                                                                                                                                          |
| <b>Lower efficacy vaccine</b>                                                  | initial efficacy = 50%<br>implemented via a Weibull decay function ( $k=0.69$ ) and half-life = 0.61 or 1.5 years                                                                                                                                                                                                                   |                                                                                                                                                                                                                                                                                                                          |
| <b>Coverage of interventions [%]</b>                                           | 0, 30, 40, 60, 70, 80, 90, 100%                                                                                                                                                                                                                                                                                                     | Includes realistic levels, but also out-of-range levels for a better understanding of the vaccine – MDA interactions and relative benefits                                                                                                                                                                               |
| <b>Congruency between interventions and covered population</b>                 | The 3 vaccine doses are given to the same population (given coverage) <sup>1</sup> , but the fourth and the fifth dose are given to random population<br>MDA is given to random proportion of the population (given coverage) for each round; and independent from vaccination <sup>2</sup> unless otherwise specified <sup>3</sup> | <sup>1</sup> assuming 100% adherence to the 3 immunization doses<br><sup>2</sup> both when the vaccine is delivered before or simultaneously to the MDA rounds<br><sup>3</sup> in a subset of the simulations, vaccination and MDA are delivered simultaneously to the same proportion of the population, given coverage |
| <b>Target age of mass vaccination</b>                                          | Minimum age is 9 months for third dose, with first dose from 5 months of age                                                                                                                                                                                                                                                        | Minimum age of 5 months at first vaccination is assumed, as intended following RTS,S implementation (5)                                                                                                                                                                                                                  |
| <b>Target age from MDA</b>                                                     | All ages but with minimum age from 6 months of age                                                                                                                                                                                                                                                                                  | As defined previously (3), pregnant women were not explicitly excluded but would reflect lower coverages                                                                                                                                                                                                                 |
| <b>Population size</b>                                                         | 10'000                                                                                                                                                                                                                                                                                                                              | MDA has shown to have better efficacy in targeted elimination strategies of small populations (6)                                                                                                                                                                                                                        |
| <b>Monitored outputs from the simulations</b>                                  | Number of patent infections per year                                                                                                                                                                                                                                                                                                |                                                                                                                                                                                                                                                                                                                          |
| <b>Definition of transmission interruption for each simulation</b>             | On average across the 5-10 years post intervention deployment period, less than 1 infected individual in 10'000                                                                                                                                                                                                                     |                                                                                                                                                                                                                                                                                                                          |

**Table S2: Overview of the main and supplementary simulated strategies.** The strategies include: MDA alone (strategies 1 and 2), vaccine alone (strategies 3, 4, s3, s4), or MDA with vaccine (strategies 5 to 8, and s5 to s8). MDA application alone is 3 rounds coinciding with the pattern of seasonal transmission, with 2-3 years of 3 rounds or 3 rounds for only the first year followed by 1-2 years of 1 round at the beginning of the transmission season (strategy 1 and 2); RTS,S-like-duration vaccine or longer duration vaccine application alone is 3 rounds coinciding with the pattern of seasonal transmission with 1-2 years of 1 dose at the beginning of the season (strategy 3 and 4) or as 3 rounds before the pattern of seasonal transmission, with 1-2 years of 1 dose at the beginning of the season (strategy s3 and s4); and strategies combining MDA with RTS,S-like-duration vaccine or longer duration vaccine are a combination of all MDA and vaccine implementations combined together (strategies 5 to 8 and s5 to s8).

| strategy            | MDA 3 rounds during the transmission season | MDA 1 round at start of transmission season | RTS,S-like-duration vaccine; 3 rounds during transmission season          | RTS,S-like-duration vaccine; 1 round start of transmission season | Longer duration vaccine; 3 rounds during transmission season          | Longer duration vaccine; 1 round start of transmission season |
|---------------------|---------------------------------------------|---------------------------------------------|---------------------------------------------------------------------------|-------------------------------------------------------------------|-----------------------------------------------------------------------|---------------------------------------------------------------|
| control             | -                                           | -                                           | -                                                                         | -                                                                 | -                                                                     | -                                                             |
| 1                   | 2 to 3 years                                | -                                           | -                                                                         | -                                                                 | -                                                                     | -                                                             |
| 2                   | year 1                                      | year 2 or year 2 and 3                      | -                                                                         | -                                                                 | -                                                                     | -                                                             |
| 3                   | -                                           | -                                           | year 1                                                                    | year 2 or year 2 and 3                                            | -                                                                     | -                                                             |
| 4                   | -                                           | -                                           | -                                                                         | -                                                                 | year 1                                                                | year 2 or year 2 and 3                                        |
| 5                   | 2 to 3 years                                | -                                           | year 1                                                                    | year 2 or year 2 and 3                                            | -                                                                     | -                                                             |
| 6                   | year 1                                      | year 2 or year 2 and 3                      | year 1                                                                    | year 2 or year 2 and 3                                            | -                                                                     | -                                                             |
| 7                   | 2 to 3 years                                | -                                           | -                                                                         | -                                                                 | year 1                                                                | year 2 or year 2 and 3                                        |
| 8                   | year 1                                      | year 2 or year 2 and 3                      | -                                                                         | -                                                                 | year 1                                                                | year 2 or year 2 and 3                                        |
| supplement strategy | MDA 3 rounds during the transmission season | MDA 3 rounds during the transmission season | RTS,S-like-duration vaccine; 3rd dose at the start of transmission season | RTS,S-like-duration vaccine; 1 round start of transmission season | Longer duration vaccine; 3rd dose at the start of transmission season | Longer duration vaccine; 1 round start of transmission season |
| s3                  | -                                           | -                                           | year 1                                                                    | year 2 or year 2 and 3                                            | -                                                                     | -                                                             |
| s4                  | -                                           | -                                           | -                                                                         | -                                                                 | year 1                                                                | year 2 or year 2 and 3                                        |
| s5                  | 2 to 3 years                                | -                                           | year 1                                                                    | year 2 or year 2 and 3                                            | -                                                                     | -                                                             |
| s6                  | year 1                                      | year 2 or year 2 and 3                      | year 1                                                                    | year 2 or year 2 and 3                                            | -                                                                     | -                                                             |
| s7                  | 2 to 3 years                                | -                                           | -                                                                         | -                                                                 | year 1                                                                | year 2 or year 2 and 3                                        |
| s8                  | year 1                                      | year 2 or year 2 and 3                      | -                                                                         | -                                                                 | year 1                                                                | year 2 or year 2 and 3                                        |

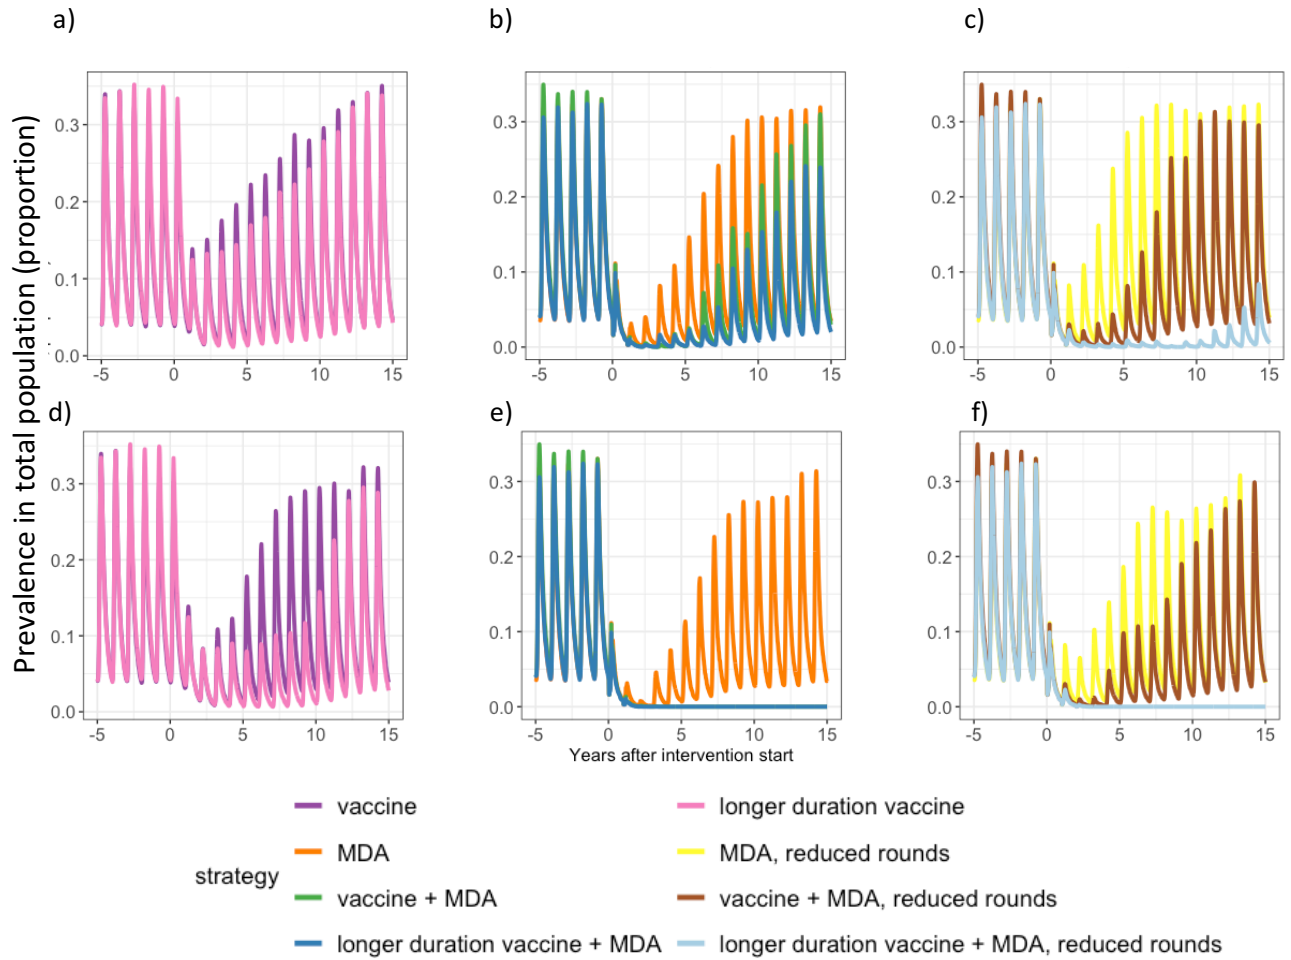

**Figure S1: Single simulation examples of estimated continuous all age prevalence following different intervention.** Plots (a-c) are for 2 years of mass intervention and plots (d-e) for 3 years of mass intervention. (a) and (d): estimated all age prevalence following mass vaccination with RTS,S-like-duration vaccine (purple) or mass vaccination with longer duration vaccine (pink), (b) and (e) estimated all age prevalence following full rounds of MDA alone (orange) or in combination with mass vaccination with RTS,S-like-duration vaccine (green) or mass vaccination with longer duration vaccine (blue), (c) and (f) estimated all age prevalence following reduced rounds of MDA alone (yellow) or in combination with mass vaccination with RTS,S-like-duration vaccine (brown) or mass vaccination with longer duration vaccine (light blue). Intervention coverage was assumed at 60%, with an initial yearly average  $PfPR_{2-10} \approx 3\% - 4\%$  with peak  $PfPR_{2-10} \approx 10\% - 15\%$  (corresponding to an initial EIR of 2 and effective access to care  $E_{14}=45\%$ ). Simulations were chosen at random, full variation of predictions for each strategy are shown in Figure S3.

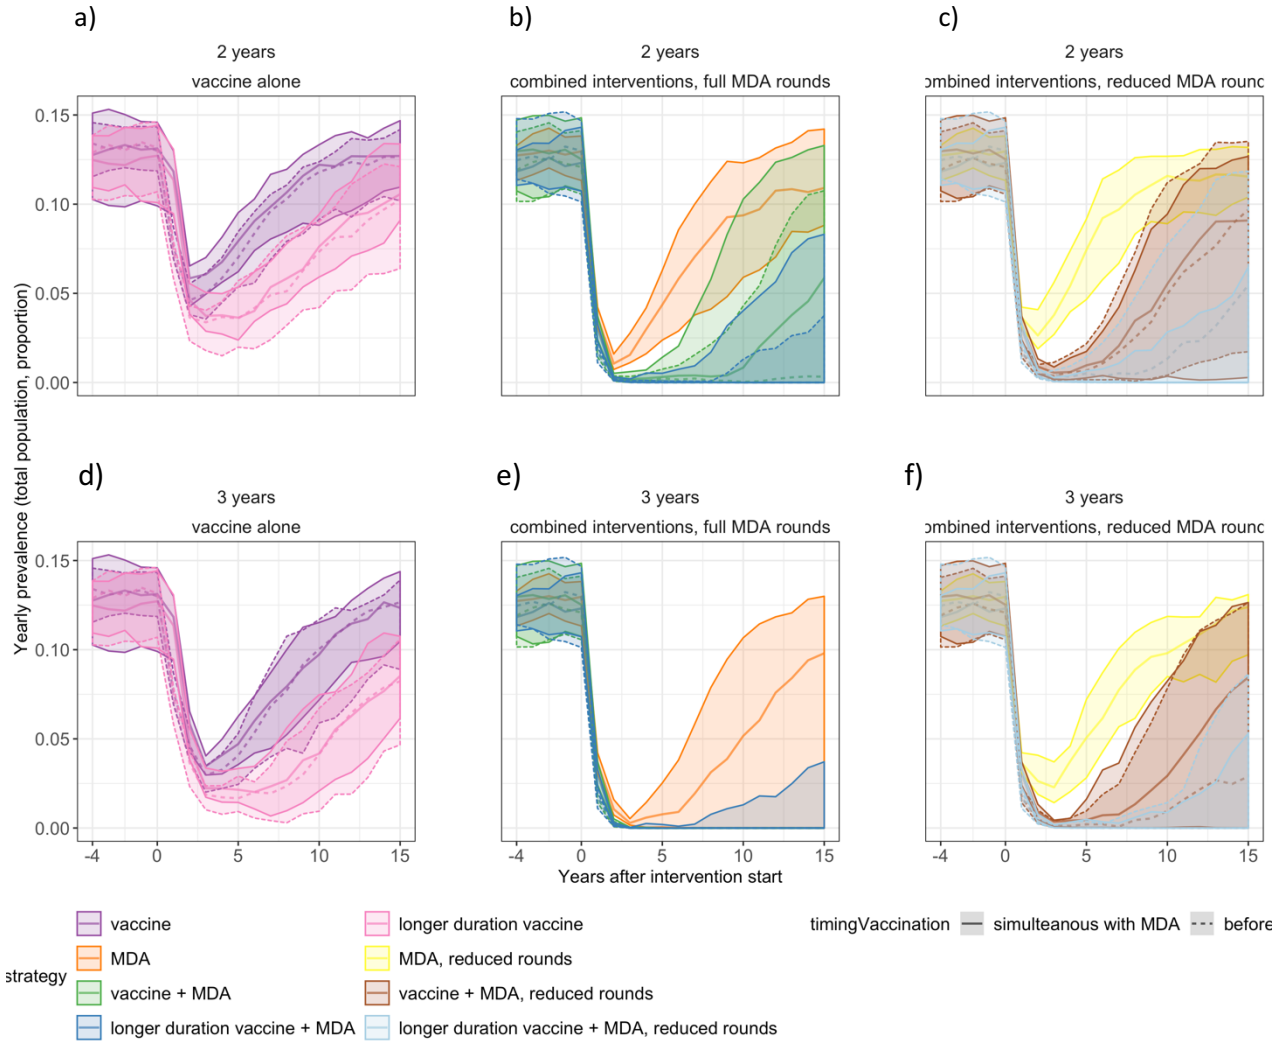

**Figure S2: Median and range of estimated yearly average all age prevalence following different intervention strategies.** Plots (a-c) are for 2 years of mass intervention and plots (d-e) for 3 years of mass intervention. (a) and (d): estimated all age prevalence following mass vaccination with RTS,S-like-duration vaccine (purple) or mass vaccination with longer duration vaccine (pink), (b) and (e) estimated all age prevalence following full rounds of MDA alone (orange) or in combination with mass vaccination with RTS,S-like-duration vaccine (green) or mass vaccination with longer duration vaccine (blue), (c) and (f) estimated all age prevalence following reduced rounds of MDA alone (yellow) or in combination with mass vaccination with RTS,S-like-duration vaccine (brown) or mass vaccination with longer duration vaccine (light blue). Strategies where vaccination was performed before the transmission season are represented by dashed lines. Each intervention is represented by the median and minimum-maximum range across 10 simulations per a strategy. Intervention coverage was assumed at 60%, with initial average annual  $PfPR_{2-10} \approx 3\% - 4\%$  with peak  $PfPR_{2-10} \approx 10\% - 15\%$  (corresponding to an initial  $EIR=2$  and effective access to care  $E_{14}=45\%$ ).

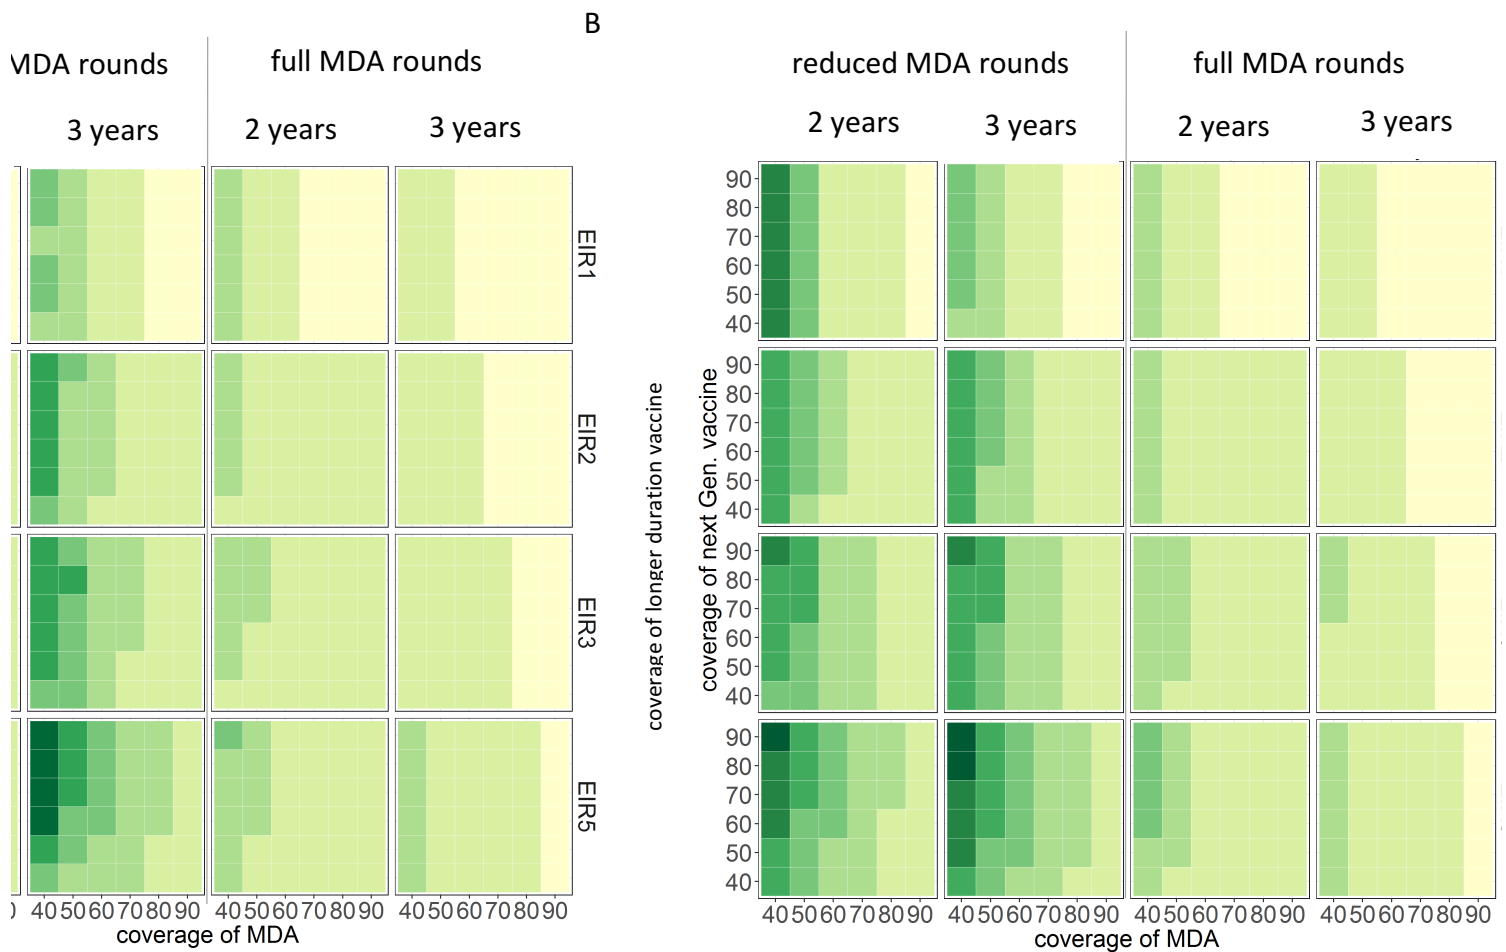

**e impact of combined strategies for different coverage levels of each intervention.** The x-axis indicates the coverage of mass vaccination. Colour represents the impact calculated as the relative maximum prevalence reduction of the combined intervention compared to MDA alone (strategy 2) at the same coverage levels (relative impact =1 means that there is the same impact, and a level of 2 means that mass vaccination with MDA is 2 times greater than MDA alone). **A** Represents the impact of mass vaccination with shorter duration vaccine and **B** represents the impact of mass vaccination with longer duration vaccine. From left to right, reduced MDA rounds with mass vaccination for 2 years, the relative impact of reduced MDA rounds with mass vaccination for 3 years, the relative impact of full MDA rounds with mass vaccination for 2 years and the relative impact of full MDA rounds with mass vaccination for 3 years. From top to bottom, EIR1, EIR2, EIR3 and EIR5.

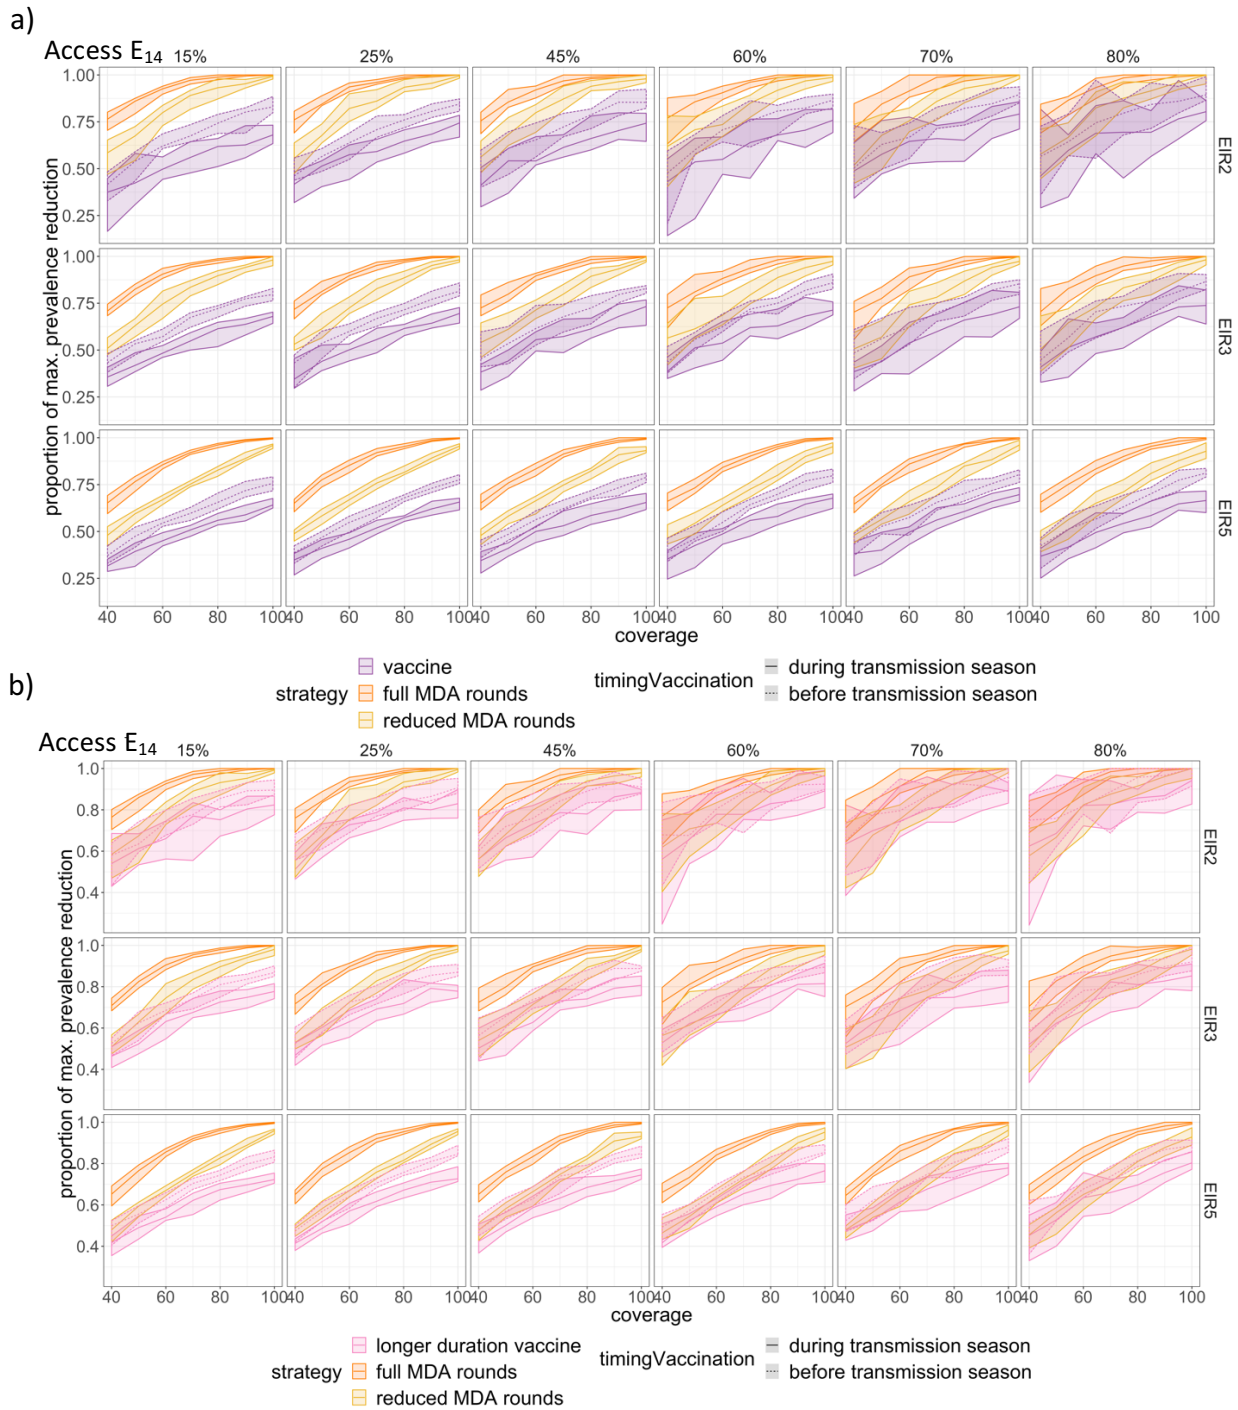

**Figure S4: Relative maximum prevalence reached depending on intervention coverage.** Maximum prevalence reduction reached by mass vaccination before (dashed lines) or during (solid lines) the transmission season and full (in orange) or reduced (in yellow) rounds of MDA. **a)** MDA is compared to mass vaccination with RTS,S-like-duration vaccine (purple) and **b)** MDA is compared to mass vaccination with longer duration vaccine (pink). The maximum prevalence reduction of each strategy is shown for different coverage levels on the x-axis, maximum prevalence reduction is shown on the y-axis from 0 (no prevalence reduction) to 1 (prevalence = 0). Each intervention is represented by the median and maximum-minimum across 10 simulations. Results are shown for different levels of passive case management (14-day effective treatment probabilities, columns) and different levels of EIR (rows), and the strategies are deployed for 2 years.

B

ination with RTS,S-like-duration vaccine relative

Impact of mass vaccination with longer duration vaccine relative to MDA

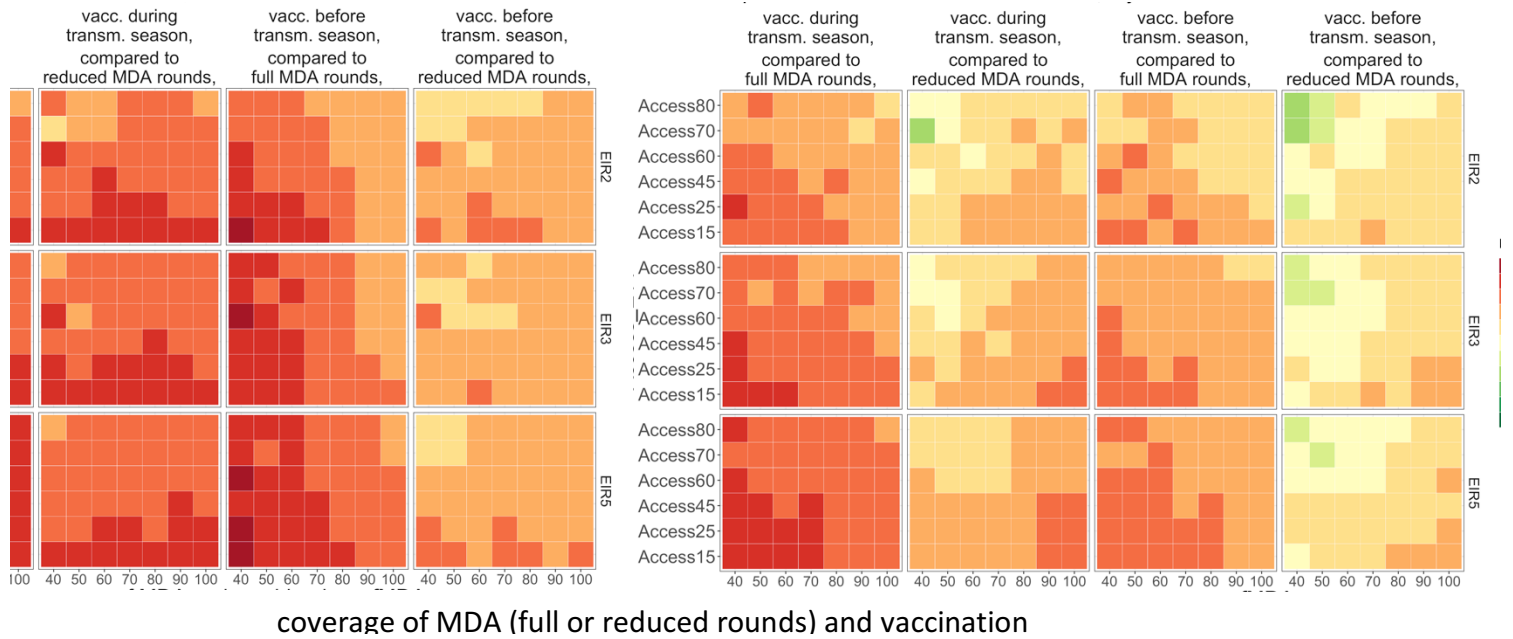

mass vaccination compared to MDA with same coverage levels comparing strategies 3 and 4 with strategy 1 and 2. The x-axis represents mass vaccination and MDA, and the y-axis indicates the passive case management levels (14-day effective treatment probability). More green (more positive) the higher the impact predicted by the simulations of mass vaccination compared to MDA, and the more red the higher the impact of MDA compared to mass vaccination. **A** Represents the impact of mass vaccination with RTS,S-like-duration vaccine. **B** Represents the impact of next generation mass vaccination with an increased duration of protection (half-life 1.5 years). Results are shown for full rounds of MDA and with reduced rounds of MDA, and for mass vaccination deployed before and during the transmission



**resurgence [%] for different deployment strategies.** The probability of resurgence is given by the percentage of the interruption of transmission did not occur. The simulations include simulations in both scenarios where the interventions. Coverage of both vaccine and MDA deployment are 60%, and  $E_{14} = 45\%$ . Strategy numbers are defined as in Table S1.

| Time deployment | EIR | $E_{14}$ | PfPR <sub>2-10</sub> | Strategies |     |     |     |     |     |     |     |     |     |     |     |     |
|-----------------|-----|----------|----------------------|------------|-----|-----|-----|-----|-----|-----|-----|-----|-----|-----|-----|-----|
|                 |     |          |                      | 1          | 2   | 3   | 4   | 5   | 6   | 7   | 8   | s3  | s4  | s5  | s6  | s7  |
| 2years          | 0.5 | 45       | <1                   | 20         | 40  | 70  | 30  | 0   | 0   | 0   | 10  | 60  | 30  | 0   | 0   | 0   |
| 2years          | 1   | 45       | 2                    | 80         | 90  | 100 | 80  | 10  | 30  | 0   | 10  | 100 | 70  | 10  | 40  | 10  |
| 2years          | 2   | 45       | 4                    | 100        | 100 | 100 | 100 | 60  | 90  | 40  | 30  | 100 | 100 | 50  | 90  | 10  |
| 2years          | 3   | 45       | 5                    | 100        | 100 | 100 | 100 | 100 | 100 | 70  | 100 | 100 | 100 | 70  | 100 | 20  |
| 2years          | 5   | 45       | 7                    | 100        | 100 | 100 | 100 | 100 | 100 | 100 | 100 | 100 | 100 | 100 | 100 | 100 |
| 2years          | 0.5 | 45       | <1                   | 0          | 40  | 80  | 10  | 0   | 10  | 0   | 0   | 50  | 20  | 0   | 0   | 0   |
| 2years          | 1   | 45       | 2                    | 20         | 70  | 70  | 80  | 0   | 10  | 0   | 0   | 100 | 70  | 0   | 20  | 0   |
| 2years          | 2   | 45       | 4                    | 80         | 100 | 100 | 100 | 0   | 90  | 10  | 40  | 100 | 100 | 0   | 50  | 0   |
| 2years          | 3   | 45       | 5                    | 100        | 100 | 100 | 100 | 20  | 90  | 10  | 70  | 100 | 100 | 30  | 70  | 0   |
| 2years          | 5   | 45       | 7                    | 100        | 100 | 100 | 100 | 80  | 100 | 30  | 100 | 100 | 100 | 60  | 100 | 20  |

**resurgence [%] for different deployment strategies, with reduced coverage of mass vaccination.** The probability of resurgence is given by the percentage of simulations in each setting (n=10) where interruption of transmission did not occur. The simulations include the interventions are deployed during 2 and 3 years. Coverage of MDA deployment are 60% and mass vaccination 40%. Strategy numbers are defined as in Table S2.

| Time deployment | EIR | E <sub>14</sub> | PfPR <sub>2-10</sub> | Strategies |     |     |     |     |     |     |     |     |     |     |     |
|-----------------|-----|-----------------|----------------------|------------|-----|-----|-----|-----|-----|-----|-----|-----|-----|-----|-----|
|                 |     |                 |                      | 3          | 4   | 5   | 6   | 7   | 8   | s3  | s4  | s5  | s6  | s7  | s8  |
| 2years          | 0.5 | 45              | <1                   | 60         | 3   | 0   | 0   | 0   | 0   | 50  | 50  | 0   | 0   | 0   | 2   |
| 2years          | 1   | 45              | 2                    | 100        | 90  | 30  | 70  | 10  | 30  | 100 | 90  | 10  | 50  | 40  | 40  |
| 2years          | 2   | 45              | 4                    | 100        | 100 | 60  | 100 | 70  | 90  | 100 | 100 | 40  | 100 | 60  | 100 |
| 2years          | 3   | 45              | 5                    | 100        | 100 | 90  | 100 | 100 | 90  | 100 | 100 | 100 | 100 | 80  | 100 |
| 2years          | 5   | 45              | 7                    | 100        | 100 | 100 | 100 | 100 | 100 | 100 | 100 | 100 | 100 | 100 | 100 |
| 3years          | 0.5 | 45              | <1                   | 50         | 30  | 10  | 10  | 0   | 0   | 30  | 50  | 0   | 0   | 0   | 0   |
| 3years          | 1   | 45              | 2                    | 100        | 80  | 10  | 20  | 0   | 40  | 100 | 90  | 0   | 10  | 10  | 0   |
| 3years          | 2   | 45              | 4                    | 100        | 100 | 10  | 90  | 30  | 60  | 100 | 100 | 10  | 80  | 20  | 50  |
| 3years          | 3   | 45              | 5                    | 100        | 100 | 50  | 100 | 30  | 80  | 100 | 100 | 40  | 100 | 10  | 100 |
| 3years          | 5   | 45              | 7                    | 100        | 100 | 100 | 100 | 50  | 100 | 100 | 100 | 90  | 100 | 70  | 100 |

**Table S5: Predicted risk of resurgence [%] for different strategies at low prevalence levels ( $PfPR_{2-10}$  1% to 5%) for different levels of case management and intervention coverage.** The probability of resurgence is estimated as the percentage of simulations in each strategy (n=20) where interruption of transmission did not occur. The simulations include simulations where initial prevalence levels range between 1%-5% given the three different case management levels  $E_{14}$  = 25%; 45% and 60%, and in both scenarios where the interventions are deployed during 2 and 3 years. Coverage of both vaccine and MDA deployments was 60%. Strategy numbers are defined as in Table S2

| Time of deployment | Strategies      |     |     |     |    |    |    |    |     |     |    |    |    |    |
|--------------------|-----------------|-----|-----|-----|----|----|----|----|-----|-----|----|----|----|----|
|                    | 1               | 2   | 3   | 4   | 5  | 6  | 7  | 8  | s3  | s4  | s5 | s6 | s7 | s8 |
| 2 years<br>3years  | $E_{14} = 25\%$ |     |     |     |    |    |    |    |     |     |    |    |    |    |
|                    | 100             | 100 | 100 | 100 | 85 | 70 | 25 | 30 | 100 | 100 | 55 | 65 | 10 | 35 |
|                    | 40              | 100 | 100 | 95  | 20 | 65 | 0  | 15 | 100 | 90  | 10 | 50 | 0  | 20 |
| 2 years<br>3years  | $E_{14} = 45\%$ |     |     |     |    |    |    |    |     |     |    |    |    |    |
|                    | 90              | 95  | 100 | 90  | 35 | 60 | 20 | 20 | 100 | 85  | 30 | 65 | 10 | 45 |
|                    | 50              | 85  | 85  | 90  | 0  | 50 | 5  | 20 | 100 | 85  | 0  | 35 | 0  | 10 |
| 2 years<br>3 years | $E_{14} = 60\%$ |     |     |     |    |    |    |    |     |     |    |    |    |    |
|                    | 80              | 90  | 95  | 85  | 35 | 55 | 5  | 30 | 95  | 100 | 35 | 65 | 5  | 15 |
|                    | 50              | 85  | 95  | 85  | 5  | 20 | 0  | 15 | 85  | 70  | 0  | 40 | 0  | 0  |

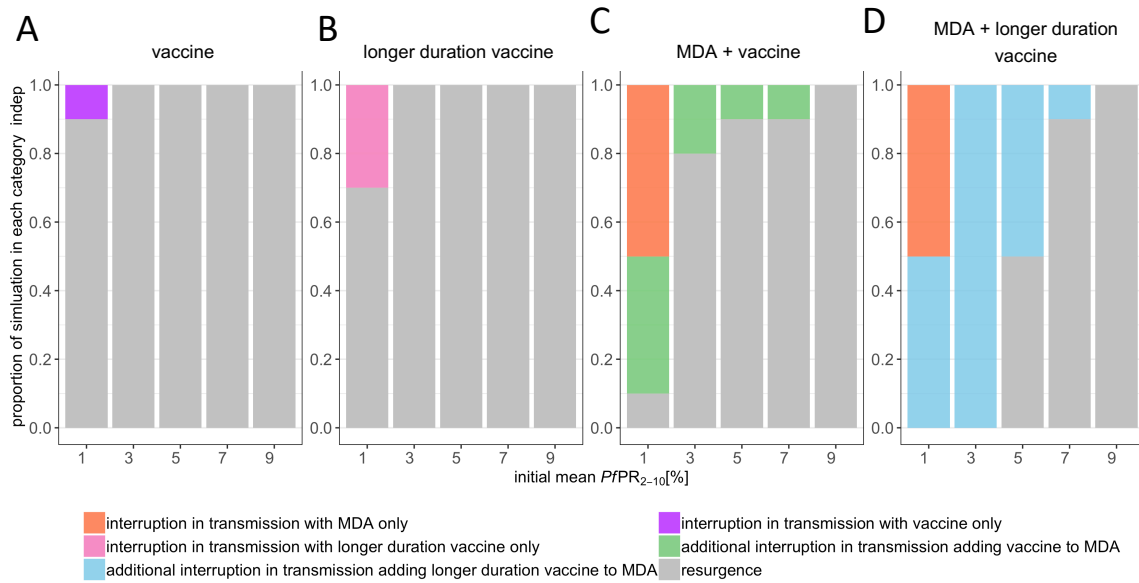

**Figure S6: Interruption of transmission for different strategies with lower case management.** Proportion of simulations in which interruption of transmission is estimated to be achieved with **A** mass vaccination, **B** mass vaccination with longer duration of protection, and MDA combined with **C** mass vaccination or **B** longer duration. Initial  $PfPR_{2-10}$  (%) levels are shown on the x-axis, and proportion of the simulations falling into each category are shown on the y-axis. All interventions were deployed for two years at a coverage of 60%, and the underlying effective access to care,  $E_{14}$ , was 25%. Categories of simulations are *i*) interruption of transmission occurred with single interventions, namely with mass vaccination with RTS,S like vaccine (purple) or longer duration vaccine (pink), or with MDA (orange), *ii*) interruption of transmission occurred only adding mass vaccination to MDA (green and blue using with RTS,S like vaccine or longer duration vaccine respectively), and *iii*) resurgence occurred and no interruption of transmission was achieved (grey).

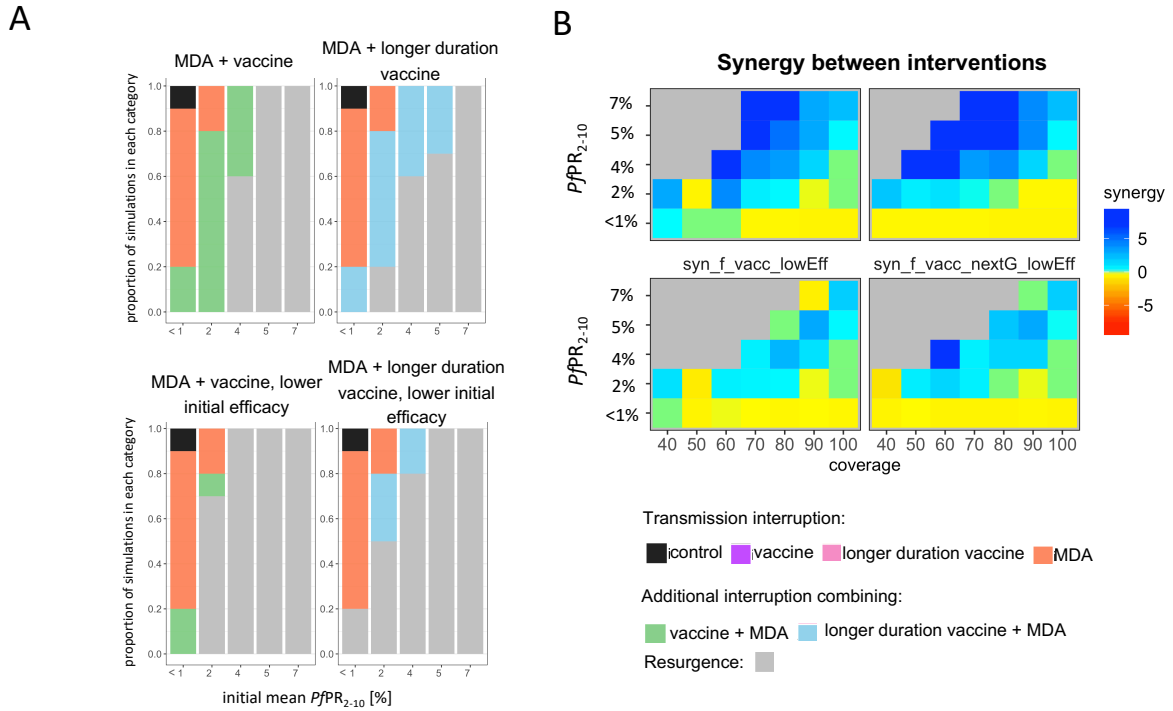

**Figure S7: Interruption of transmission and synergism for different combined strategies with simultaneous MDA and mass vaccination interventions delivered to the same proportion of the population given coverage. A** Proportion of simulations in which interruption of transmission is estimated to be achieved with mass vaccination combined to MDA. Upper plots indicate interruption of transmission using a vaccine with initial efficacy of 91% and half-life of 0.61 years (upper row, left) or 1.5 years (upper row, right), and lower plots indicate interruption of transmission using a vaccine with initial efficacy of 50% and half-life of 0.61 years (bottom row, left) or 1.5 years (bottom row, right). Initial  $PfPR_{2-10}$  (%) levels are shown on the x-axis, and proportion of the simulations falling into each category are shown on the y-axis. All interventions were deployed for two years at a coverage of 60%. Categories of simulations are *i*) interruption of transmission occurred with no intervention at all, due to very low initial prevalence (black), *ii*) interruption of transmission occurred with single interventions, namely with mass vaccination with RTS,S like vaccine or lower efficacy (purple) or longer duration vaccine (pink), or with MDA (orange), *iii*) interruption of transmission occurred only adding mass vaccination to MDA (green and blue using with RTS,S like vaccine or longer duration vaccine respectively), and *iv*) resurgence occurred and no interruption of transmission was achieved (grey). **B** Estimated synergy coefficient ( $\sigma$ ) of the combined mass vaccination and MDA intervention in regards probability to interrupt transmission. The x-axis indicates coverage levels of bot MDA and mass vaccination, and the y-axis initial  $PfPR_{2-10}$  (%), and the level of synergy between the two intervention strategies are indicated by colour. Blue represents synergistic behavior ( $>0$ ) in the combined MDA and mass vaccination, light green represents values of 0 which imply the combined interventions are not more than additive, and colours yellow to red represent values less than 0 which implies less than additive or maximum level was reached by one or both single interventions. Grey areas represent settings where resurgence occurred in all simulation, thus no synergy could be calculated. The synergy coefficients are shown for the combination of MDA with vaccine of initial vaccine efficacy of 91% (upper row) and half-life of 0.61 years (left) or 1.5 years (right), and MDA with the lower vaccine efficacy of 50% (bottom row) and half-life of 0.61 years (left) or 1.5 years (right).

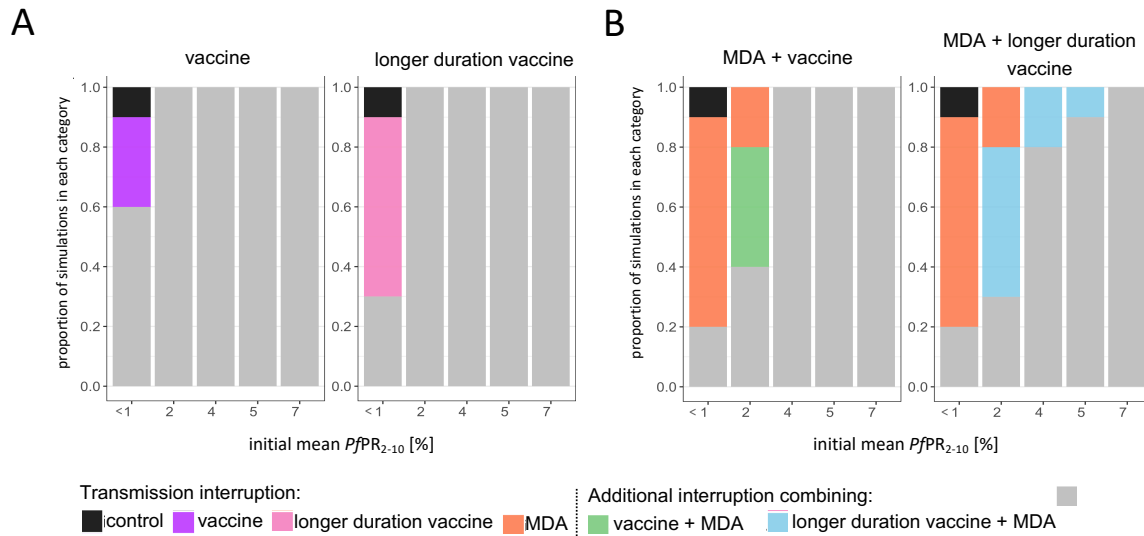

**Figure S8: Interruption of transmission for mass vaccination and combined strategies with lower vaccine efficacy.** Proportion of simulations in which interruption of transmission is estimated to be achieved with mass vaccination, **A**, or with mass vaccination combined to MDA, **B**, using a vaccine with initial efficacy of 50% and half-life of 0.61 years (left of each panel), and using a vaccine with initial efficacy of 50% and half-life of 1.5 years (right of each panel). Initial  $PfPR_{2-10}$  (%) levels are shown on the x-axis, and proportion of the simulations falling into each category are shown on the y-axis. All interventions were deployed for two years at a coverage of 60%. Categories of simulations are *i*) interruption of transmission occurred with no intervention at all, due to very low initial prevalence (black), *ii*) interruption of transmission occurred with single interventions, namely with mass vaccination with a lower efficacy vaccine with half-life of 0.61 years (purple) or longer duration vaccine (pink), or with MDA (orange), *iii*) interruption of transmission occurred only adding mass vaccination to MDA (green and blue using with a lower efficacy vaccine with half-life of 0.61 years or longer duration vaccine respectively), and *iv*) resurgence occurred and no interruption of transmission was achieved (grey).

**A) 1 year of intervention, combination with RTS,S like vaccine**

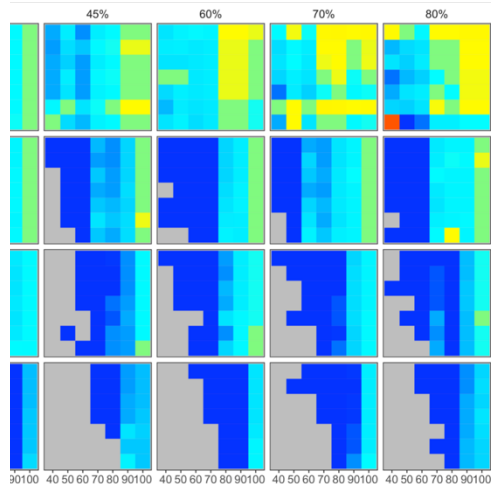

**B) 2 years of intervention, combination with longer duration vaccine**

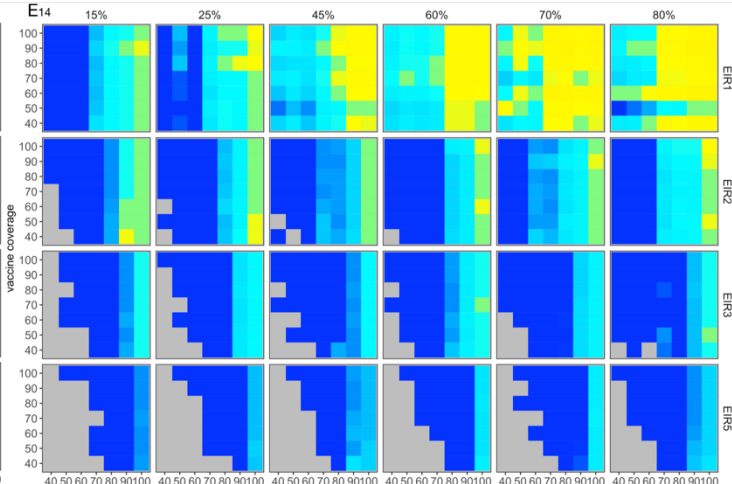

**C) 1 year of intervention, combination with RTS,S like vaccine**

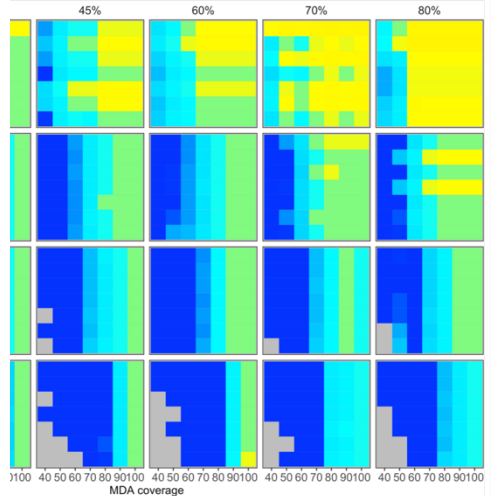

**D) 3 years of intervention, combination with longer duration vaccine**

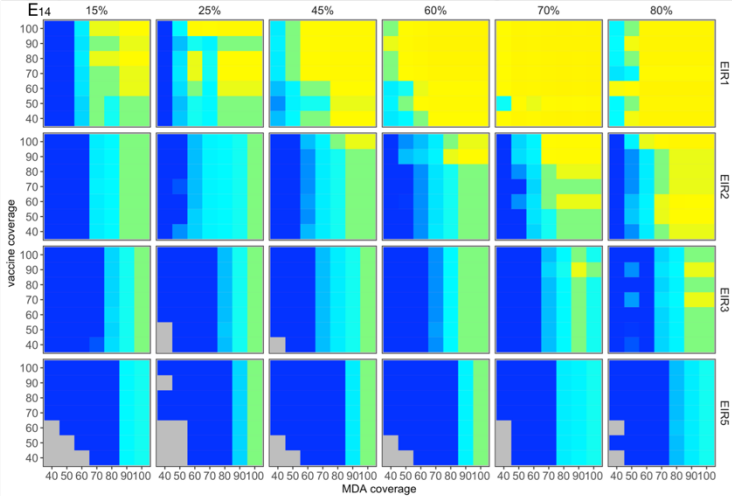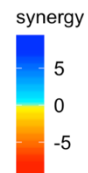

**Figure S9: Synergy coefficient of MDA combined with mass vaccination with RTS,S like vaccine and longer duration vaccine.**  
The x-axis is MDA coverage level and the y-axis is vaccine coverage level. The color scale represents the synergy coefficient between the two strategies ( $\sigma$ ). Values of  $\sigma$  greater than 0, in light green, represent that the two combined interventions are more than additive. Values less than 0, in red, imply less than maximum level of synergy by one or both interventions. Values of  $\sigma$  represent synergy coefficient in resurgence simulations, can be calculated as  $\sigma = \sigma_{combined} - \sigma_{MDA} - \sigma_{vaccine}$  represent the synergy coefficient between the two strategies.

Figure S9 shows the synergy coefficient of MDA combined with mass vaccination with RTS,S like vaccine, **B)** represent the synergy coefficient of MDA combined with mass vaccination with a vaccine with longer duration of protection, **C)** represent the synergy coefficient of MDA combined with mass vaccination with RTS,S like vaccine and **D)** represent the synergy coefficient of MDA combined with mass vaccination with a vaccine with longer duration of protection. Results are shown for different (14-day effective treatment probabilities) (rows) and different levels of EIR (columns).

**surge parameters for 2 years deployment of MDA, mass vaccination, or combination of both MDA and imported infections.** The estimated parameters to individual regressions to each 10 simulations in each strategies: 95% confidence intervals for the estimated half-life,  $\lambda_{50}$ , representing the years after maximum prevalence was reached where prevalence was reached where 10% of the resurgence occurred. The interventions are deployed during 2 years, initial prevalence ( $i$ ) and  $E_{14}=25\%$ ). In the combined strategies, estimates when vaccination and drugs are given to the same proportion ( $i$ ) and  $E_{14}=25\%$ ). If not specified, a random coverage of the population is selected independently for each intervention.  $V$  and in the combined strategies specified by  $B$  initial vaccine efficacy against infection is lower at 50%.

| importation                                   |    | half-life, $\lambda_{50}$ |                                 | Hill slope          |                                | 10% resurgence threshold |                 |
|-----------------------------------------------|----|---------------------------|---------------------------------|---------------------|--------------------------------|--------------------------|-----------------|
| EIR = 5; $E_{14}$ = 25 % ; $PfPR_{2-10}$ = 9% |    |                           |                                 |                     |                                |                          |                 |
| vaccination                                   | 0  | 3.68                      | [ 3.34 - 4.02 ]                 | 3.55                | [ 3.05 - 5.05 ]                | 2.00                     | [ 1.80 - 2.32 ] |
|                                               |    | 3.68 <sup>A</sup>         | [ 3.21 – 3.86 ] <sup>A</sup>    | 3.78 <sup>A</sup>   | [ 2.61 – 4.48 ] <sup>A</sup>   | 1.92 <sup>*</sup>        | [ 1.43 - 2.31 ] |
|                                               |    | 2.56 <sup>A,B</sup>       | [ 2.21 – 2.93 ] <sup>A,B</sup>  | 2.84 <sup>A,B</sup> | [ 2.02 – 3.21 ] <sup>A,B</sup> | 1.20 <sup>A,B</sup>      | [ 0.82 - 1.34 ] |
|                                               | 2  | 3.29                      | [ 2.90 - 4.10 ]                 | 3.54                | [ 3.08 - 4.35 ]                | 1.83                     | [ 1.42 - 2.38 ] |
|                                               | 20 | 2.36                      | [ 2.10 - 2.72 ]                 | 2.42                | [ 1.77 - 2.96 ]                | 0.94                     | [ 0.66 - 1.24 ] |
| vaccination + drugs                           | 0  | 4.00                      | [ 3.14-5.39 ]                   | 3.87                | [3.42- 5.97 ]                  | 2.26                     | [1.71 -3.45 ]   |
|                                               | 2  | 3.54                      | [ 2.84-4.29 ]                   | 3.98                | [3.09 -4.59 ]                  | 2.09                     | [ 1.57-2.60 ]   |
|                                               | 20 | 2.35                      | [ 1.97-2.99 ]                   | 2.52                | [1.94 -2.88 ]                  | 0.98                     | [ 0.81-1.09 ]   |
|                                               | 0  | 1.83                      | [ 1.46 - 2.52 ]                 | 2.57                | [ 1.93 - 3.06 ]                | 0.72                     | [ 0.60 - 1.19 ] |
|                                               | 2  | 1.66                      | [ 1.41 - 1.95 ]                 | 2.64                | [ 1.97 - 3.02 ]                | 0.67                     | [ 0.56 - 0.86 ] |
|                                               | 20 | 1.36                      | [ 1.20 - 1.54 ]                 | 2.25                | [ 1.84 - 2.62 ]                | 0.49                     | [ 0.41 - 0.58 ] |
| vaccination + drugs + MDA                     | 0  | 2.75                      | [ 2.11 - 3.59 ]                 | 2.71                | [ 1.52 - 3.59 ]                | 1.04                     | [ 0.64 - 1.68 ] |
|                                               | 2  | 2.78                      | [ 2.09 - 3.32 ]                 | 2.58                | [ 1.78 - 3.34 ]                | 1.16                     | [ 0.92 - 1.51 ] |
|                                               | 20 | 2.55                      | [ 2.01 - 3.19 ]                 | 2.05                | [ 1.35 - 3.12 ]                | 0.88                     | [ 0.56 - 1.07 ] |
|                                               | 0  | 2.48                      | [2.26-2.76 ]                    | 2.28                | [1.81 -2.74 ]                  | 0.92                     | [0.69 -1.18 ]   |
|                                               | 2  | 2.54                      | [ 2.34-3.07 ]                   | 2.39                | [ 1.79-3.36]                   | 0.98                     | [0.80 -1.30 ]   |
|                                               | 20 | 1.98                      | [ 1.60-2.64 ]                   | 2.12                | [ 1.37-2.89 ]                  | 0.71                     | [ 0.49-0.84 ]   |
| EIR = 2; $E_{14}$ = 45 % ; $PfPR_{2-10}$ = 4% |    |                           |                                 |                     |                                |                          |                 |
| vaccination                                   | 0  | 6.78                      | [ 5.05 - 12.92 ]                | 3.12                | [ 2.76 - 4.15 ]                | 3.46                     | [ 2.60 - 6.11 ] |
|                                               |    | 7.25 <sup>A</sup>         | [ 5.19 – 8.35 ] <sup>A</sup>    | 3.09 <sup>A</sup>   | [ 1.67 - 4.22 ] <sup>A</sup>   | 3.44 <sup>A</sup>        | [ 1.85 - 4.55 ] |
|                                               |    | 6.37 <sup>B</sup>         | [ 5.12 – 10.24 ] <sup>B</sup>   | 3.25 <sup>B</sup>   | [ 2.87 – 5.46 ] <sup>B</sup>   | 6.37 <sup>B</sup>        | [ 5.12 – 10.2 ] |
|                                               |    | 6.31 <sup>A,B</sup>       | [ 3.80 – 10.83 ] <sup>A,B</sup> | 2.92 <sup>A,B</sup> | [ 1.49 - 4.73 ] <sup>A,B</sup> | 2.98 <sup>A,B</sup>      | [ 1.67 – 5.17 ] |

|      |    |      |                 |      |                 |      |                 |
|------|----|------|-----------------|------|-----------------|------|-----------------|
|      | 2  | 6.43 | [ 4.80 – 8.27 ] | 2.94 | [ 2.36 - 4.61 ] | 3.02 | [ 2.55 – 3.67 ] |
|      | 20 | 3.12 | [ 2.73 – 3.86 ] | 2.36 | [ 1.66 - 2.75 ] | 1.16 | [ 0.90 - 1.41 ] |
| sion | 0  | 9.74 | [8.37 -62.41 ]  | 4.34 | [3.14 -216.15 ] | 5.80 | [4.84 -61.25 ]  |
|      | 2  | 7.36 | [5.33 -11.95 ]  | 2.76 | [ 2.23-4.58 ]   | 3.93 | [ 2.21-5.06 ]   |
|      | 20 | 3.11 | [ 2.71-3.25 ]   | 1.89 | [ 1.62-3.30 ]   | 0.91 | [ 0.81- 1.59]   |
|      | 0  | 4.63 | [ 3.21 – 9.57 ] | 2.23 | [ 1.71 – 4.38 ] | 1.98 | [ 1.30 - 3.19 ] |
|      | 2  | 4.22 | [ 3.62 – 6.00 ] | 2.33 | [ 1.50 – 2.94 ] | 1.68 | [ 0.91 - 1.86 ] |
|      | 20 | 2.09 | [ 1.72 – 2.60 ] | 1.81 | [ 1.33 – 2.71 ] | 0.55 | [ 0.41 – 0.88 ] |
|      | 0  | 3.45 | [ 2.09 – 6.09 ] | 2.38 | [ 1.25 – 4.76 ] | 1.31 | [ 0.56 – 2.30 ] |
|      | 2  | 4.35 | [ 2.95 – 5.52 ] | 1.88 | [ 1.00 – 4.83 ] | 1.41 | [ 0.48 – 2.05 ] |
|      | 20 | 3.60 | [ 2.36 – 6.15 ] | 2.52 | [ 1.42 – 4.55 ] | 1.58 | [ 0.88 – 2.38 ] |
|      | 0  | 4.01 | [ 2.71- 6.93]   | 2.99 | [ 1.37-4.03 ]   | 1.75 | [ 1.24-2.22 ]   |
|      | 2  | 4.99 | [ 2.41-6.55 ]   | 1.55 | [ 1.02-3.92 ]   | 1.09 | [ 0.48-2.05 ]   |
|      | 20 | 3.12 | [ 2.29-4.28 ]   | 2.56 | [ 0.88-4.27 ]   | 1.24 | [ 0.33-1.61 ]   |



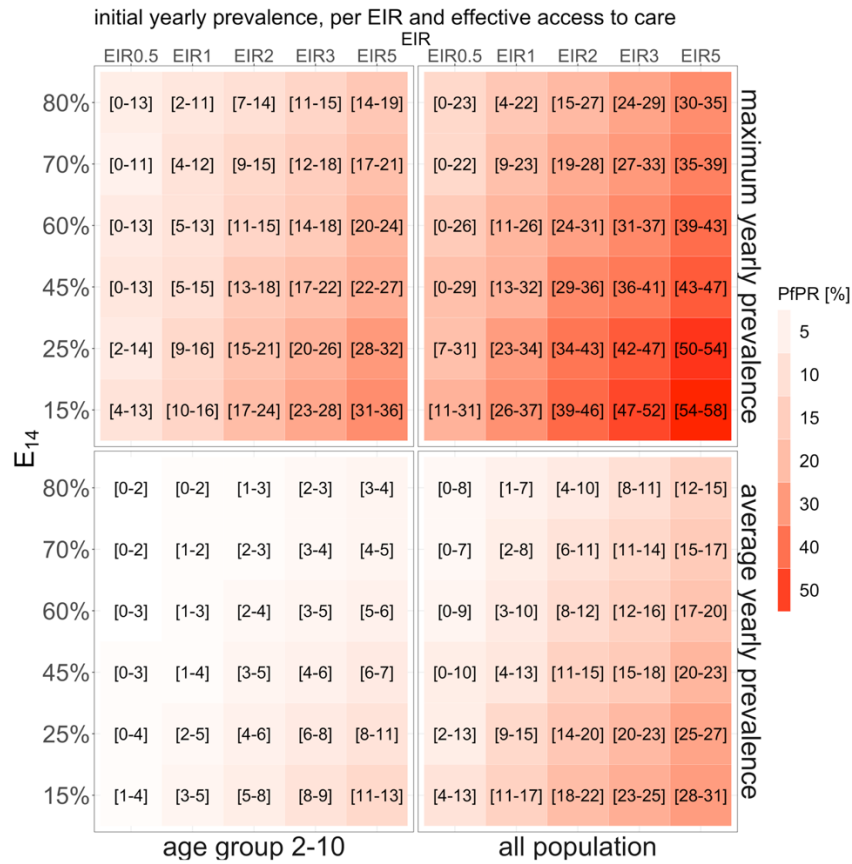

**Figure S10: Relationship between entomological inoculation rate, EIR, and effective access to care,  $E_{14}$ , with  $PfPR_{2-10}$  and prevalence in all population.** 5 different levels of EIR, from 0.5 to 5, are represented in the x-axis and 6 different levels of effective treatment  $E_{14}$ = 15%; 25%; 45%; 60%; 70% 80%. The corresponding prevalence with given access and EIR levels is shown by the color gradient, the upper plots representing the maximum prevalence in the seasonal setting and the lower plots the average yearly prevalence. The plots on the left show  $PfPR_{2-10}$  levels and the plots on the right the prevalence in all population. Results are across 10 simulations for each setting, the median value across the simulations is indicated by the color gradient, and the 95% range is indicated in brackets

## References

1. Smith T, et al. (2012) Ensemble modeling of the likely public health impact of a pre-erythrocytic malaria vaccine. *PLoS Med* 9(1). doi:10.1371/journal.pmed.1001157.
2. Crowell V, et al. (2012) Can we depend on case management to prevent re-establishment of *P. falciparum* malaria, after local interruption of transmission? *Epidemics* 4(1):1–8.
3. Brady OJ, et al. (2017) Role of mass drug administration in elimination of *Plasmodium falciparum* malaria: a consensus modelling study. *Lancet Glob Heal* 5(7):e680–e687.
4. Penny MA, et al. (2016) Public health impact and cost-effectiveness of the RTS,S/AS01 malaria vaccine: a systematic comparison of predictions from four mathematical models. *Lancet* 387(10015):1–9.
5. World Health Organization (2016) Weekly epidemiological record: relevé épidémiologique hebdomadaire. *Wkly Epidemiol Rec* (47):445–452.
6. Malaria Policy Advisory Committee Meeting (2015) Consensus modelling evidence to support the design of mass drug administration programmes (WHO, Geneva).
